# Supplementary material for: Reconciling Estimates of Cell Proliferation from Stable Isotope Labeling Experiments
Source: PubMed Central journal article supplement (PMC4593553; doi:10.1371/journal.pcbi.1004355), 2015-10-05
Supplement: pcbi.1004355.s001.pdf [file pcbi.1004355.s001.pdf]

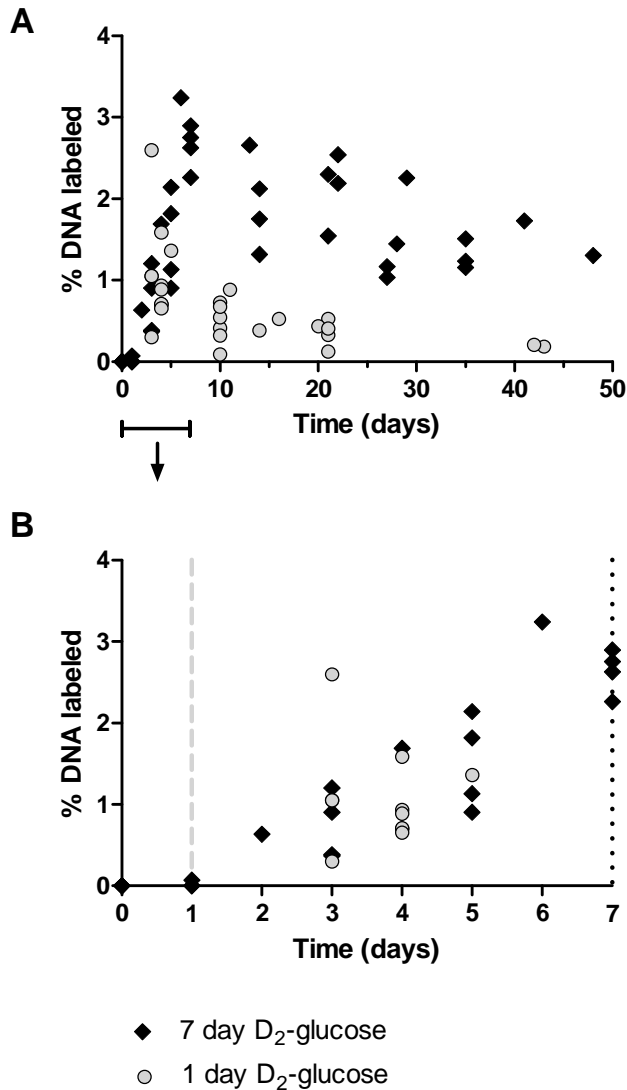

**S1 Figure. Normalized CD4<sup>+</sup> T cell enrichment in one-day and seven-day D<sub>2</sub>-glucose labeling studies of humans.** The percentage of labeled DNA in CD4<sup>+</sup> T cells as observed in the seven-day (closed diamonds) and one-day (open circles) D<sub>2</sub>-glucose-labeling studies [6,13], **(A)** over the entire course of the experiment and **(B)** zoomed in to the first seven days. The end of the one-day and the seven-day labeling period are marked by the dashed gray and black lines, respectively. This data has been normalized for both the intracellular dilution ( $b_g$ ) and the availability of D<sub>2</sub>-glucose in the plasma. Therefore, everything being equal, we would expect the fraction of labelled DNA in CD4<sup>+</sup> T cells at day 3 to be approximately 3 times higher in the seven-day labelling experiment than in the one-day labelling experiment (as individuals will have been labelled for 3 times longer and therefore 3 times as many cells will have divided). Instead the fraction of labelled cells is very similar in the two experiments.
