# Supplementary material for: Reconciling Estimates of Cell Proliferation from Stable Isotope Labeling Experiments
Source: PubMed Central journal article supplement (PMC4593553; doi:10.1371/journal.pcbi.1004355), 2015-10-05
Supplement: pcbi.1004355.s003.pdf [file pcbi.1004355.s003.pdf]

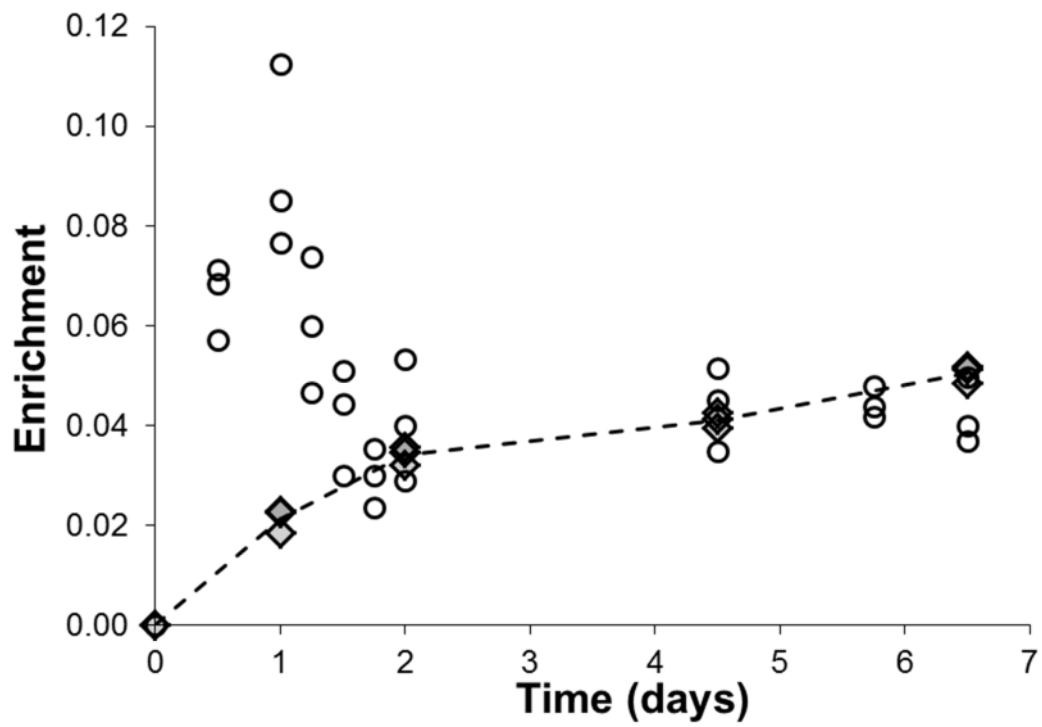

**S3 Figure. Plasma glucose and Thymocyte DNA labeling in mice receiving D<sub>2</sub>-glucose.** Deuterium labeling in plasma glucose taken both during light and dark phases (open circles, n=27) and thymocyte DNA (filled diamonds, dotted line, n=12) in 12 mice receiving oral feed labeled with D<sub>2</sub>-glucose.
