# Supplementary material for: Reconciling Estimates of Cell Proliferation from Stable Isotope Labeling Experiments
Source: PubMed Central journal article supplement (PMC4593553; doi:10.1371/journal.pcbi.1004355), 2015-10-05
Supplement: pcbi.1004355.s005.pdf [file pcbi.1004355.s005.pdf]

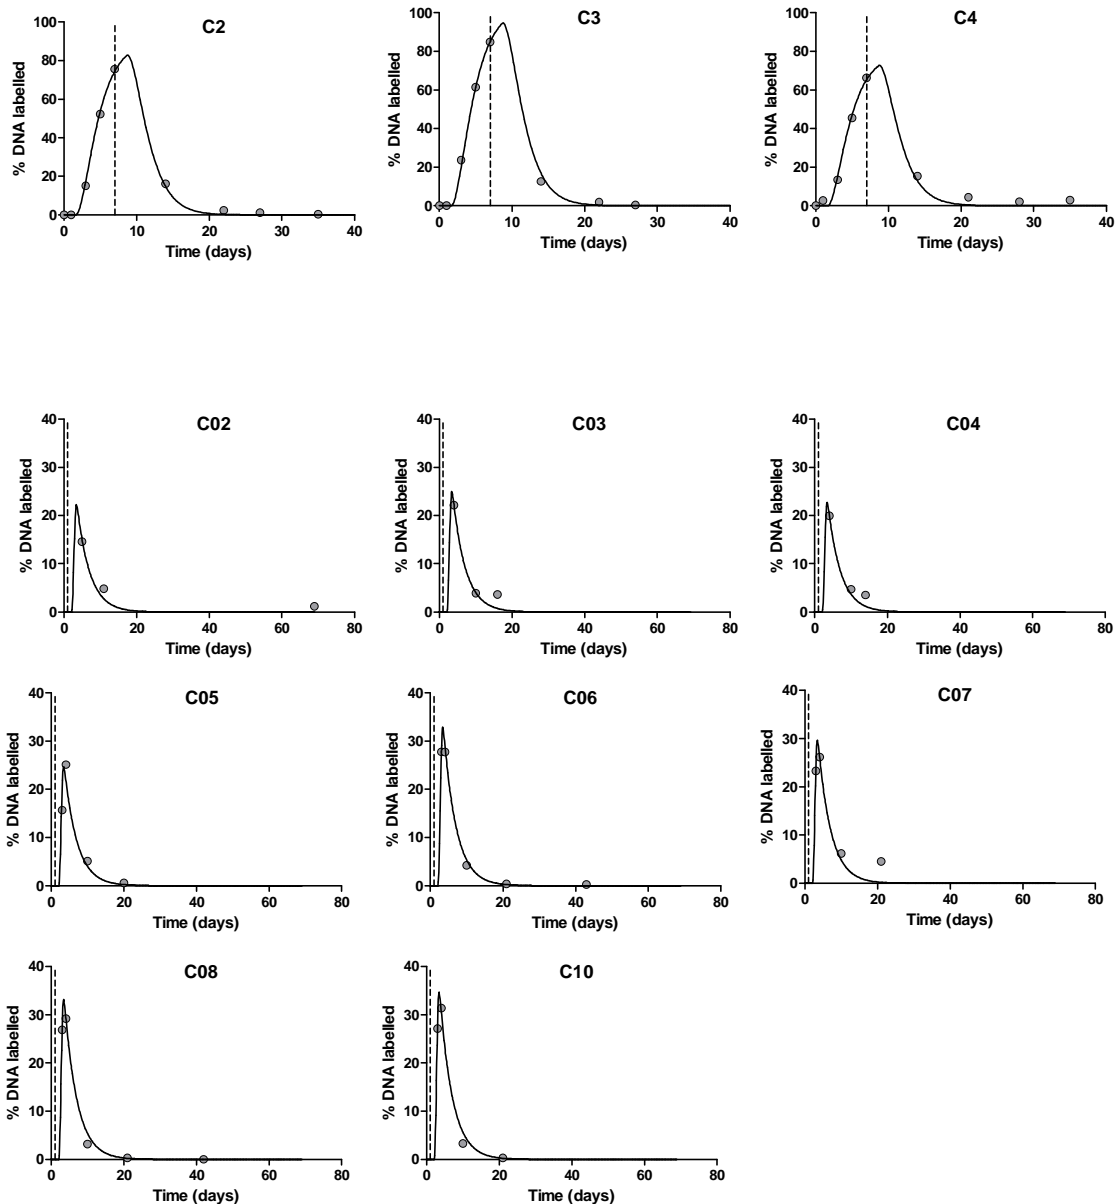

**S5 Figure. Fit of the “bone marrow” model to the fraction of DNA labeled in peripheral blood monocytes in healthy humans.** Best fits (black lines) to deuterium enrichment in the DNA of peripheral blood monocytes. First row (subjects C2-C4) are subjects in the seven-day  $D_2$ -glucose study [13]; rows 2-4 (subjects C02-C10) are subjects in the one-day  $D_2$ -glucose study [6]. Prior *in vitro* experiments were used to determine the maximum percentage of labeled DNA that cells could possibly attain giving  $b_g=0.65$ , (see Materials and Methods), and all measured enrichments were normalized by dividing by  $b_g \times \text{area under the measured plasma glucose curve}$ . Each panel represents one subject, the end of label administration is marked by a dashed vertical line.
