# Supplementary material for: Reconciling Estimates of Cell Proliferation from Stable Isotope Labeling Experiments
Source: PubMed Central journal article supplement (PMC4593553; doi:10.1371/journal.pcbi.1004355), 2015-10-05
Supplement: pcbi.1004355.s006.pdf [file pcbi.1004355.s006.pdf]

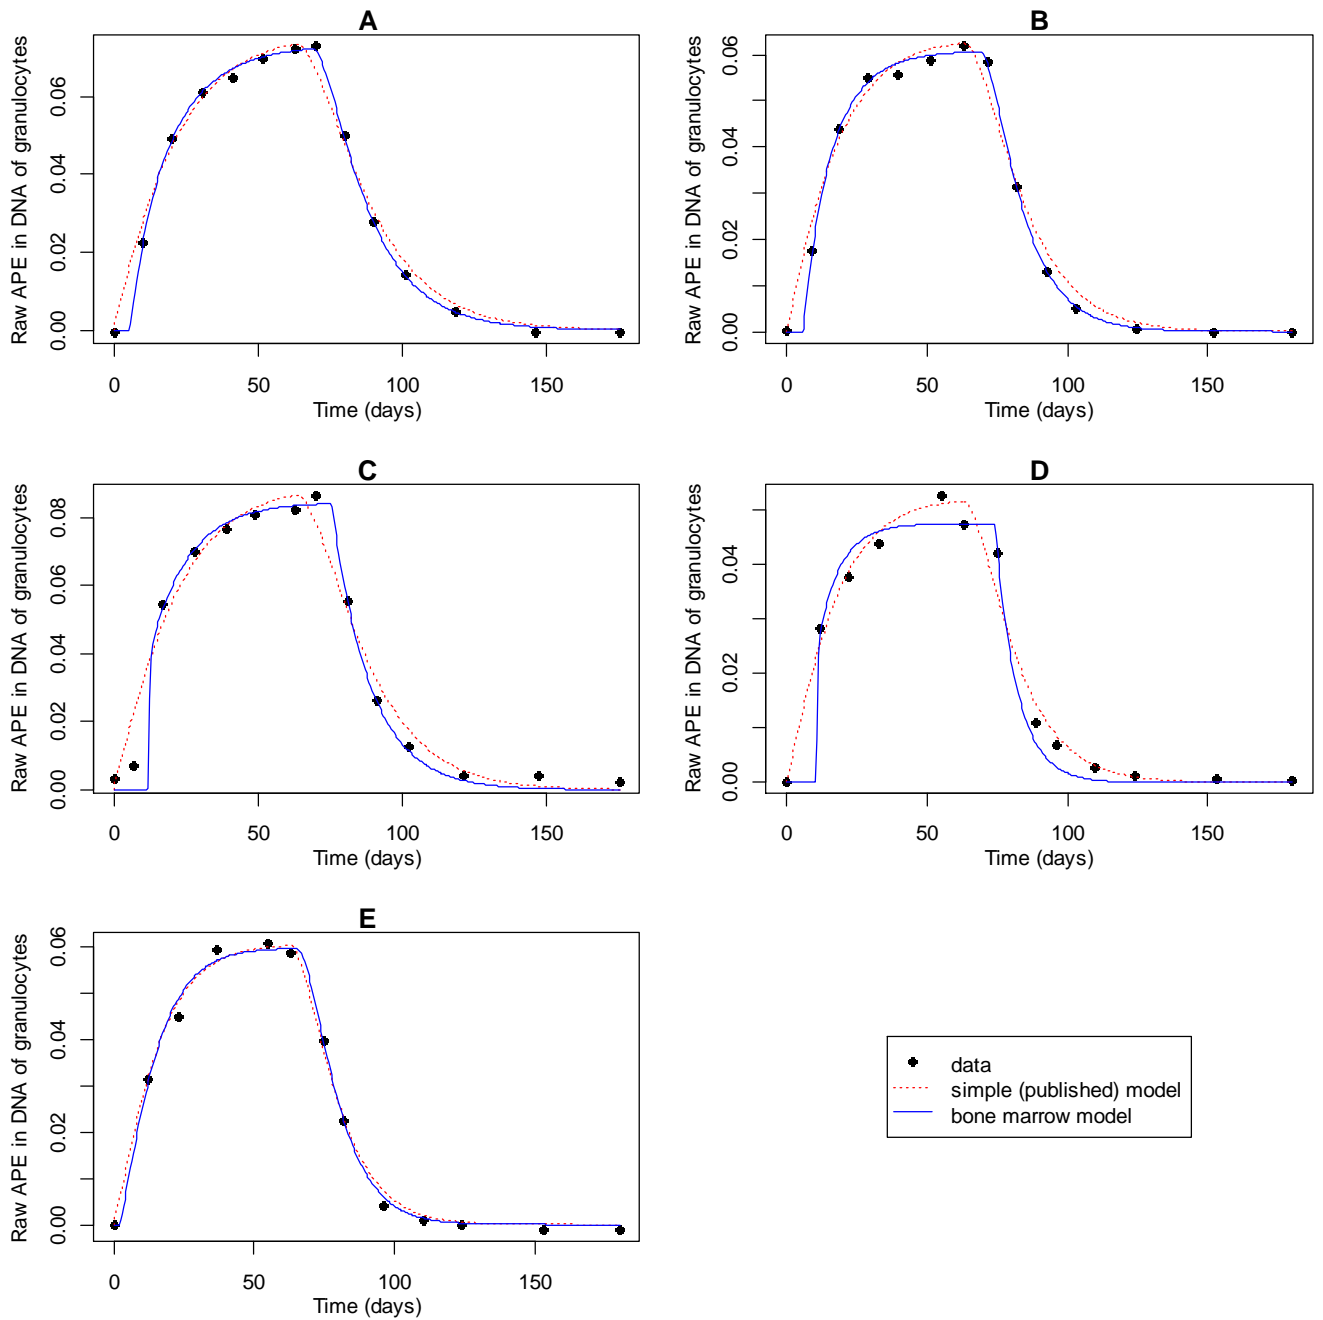

**S6 Figure. Fit of simple published model and bone marrow model to label in DNA of granulocytes in healthy humans.** To normalize the label in DNA of T cells following a 9w D<sub>2</sub>O labeling protocol the maximum level of enrichment in granulocytes was estimated by fitting a simple mathematical model. Plots show the experimentally measured level of enrichment in DNA of granulocytes from 5 subjects (A-E) [8], the best fit of the simple, published model (red dotted line, [8]) and the best fit of the more physiological bone marrow model (solid blue line, see Materials and Methods). The lag  $\Delta$  varies between individuals but the estimate of  $b_w$  is insensitive to this value.
