# Supplementary material for: Reconciling Estimates of Cell Proliferation from Stable Isotope Labeling Experiments
Source: PubMed Central journal article supplement (PMC4593553; doi:10.1371/journal.pcbi.1004355), 2015-10-05
Supplement: pcbi.1004355.s007.pdf [file pcbi.1004355.s007.pdf]

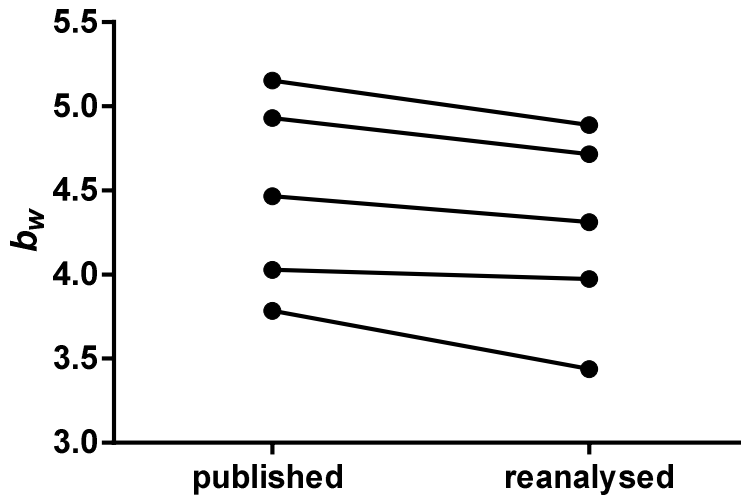

**S7 Figure. Estimates of the intracellular dilution factor  $b_w$  in healthy humans.** The intracellular dilution factor  $b_w$  is estimated by fitting a model to the level of enrichment in DNA of granulocytes. We considered two models, the simple published model [8] and a more physiological model (Materials & Methods). The fits of the models to the data are shown in S6 Figure, the resulting estimates of  $b_w$  are shown here. The 95% confidence intervals of the estimates are also plotted but are too small to be seen. The reanalysis results in a small but statistically significant decrease in  $b_w$ . If T cell proliferation rates are estimated with this refined value of  $b_w$  then they increase significantly ( $P=0.0003$ ) but again the difference is numerically small (1-10%).
