# Supplementary material for: Reconciling Estimates of Cell Proliferation from Stable Isotope Labeling Experiments
Source: PubMed Central journal article supplement (PMC4593553; doi:10.1371/journal.pcbi.1004355), 2015-10-05
Supplement: pcbi.1004355.s008.pdf [file pcbi.1004355.s008.pdf]

**S1 Table** Estimates of proliferation rate from *in vitro* D<sub>2</sub>-glucose and D<sub>2</sub>O labeling.

|              | Expt. | Proliferation rate (day <sup>-1</sup> ) |                  |
|--------------|-------|-----------------------------------------|------------------|
|              |       | D <sub>2</sub> -glucose                 | D <sub>2</sub> O |
| matched      | 1     | 0.52 ± 0.05                             | 0.54 ± 0.06      |
|              | 2     | 0.48 ± 0.06                             | 0.50 ± 0.07      |
|              | 3     | 0.54 ± 0.11                             | 0.48 ± 0.11      |
|              | 4     | 0.52 ± 0.09                             | 0.46 ± 0.08      |
|              | 5     | 0.51 ± 0.09                             | 0.55 ± 0.09      |
|              | 6     | 0.50 ± 0.09                             | 0.55 ± 0.08      |
| unmatched    | 7     | 0.55 ± 0.06                             | 0.41 ± 0.11      |
|              | 8     | 0.55 ± 0.05                             | 0.41 ± 0.11      |
|              | 9     | 0.49 ± 0.11                             | 0.56 ± 0.06      |
|              | 10    | 0.47 ± 0.12                             | 0.56 ± 0.06      |
|              | 11    | 0.57 ± 0.07                             |                  |
|              | 12    | 0.54 ± 0.07                             |                  |
| <b>MEAN</b>  |       | 0.52                                    | 0.50             |
| <b>STDEV</b> |       | 0.03                                    | 0.06             |

Experiments 1-6 inclusive were dual labeling experiments, so the cells in D<sub>2</sub>-glucose experiment 1 are the same as the cells in D<sub>2</sub>O experiment 1, etc. Experiments 7 and above are independent datasets with no correspondence between the D<sub>2</sub>-glucose and the D<sub>2</sub>O experiments. Estimates are shown with 95% confidence intervals. These proliferation rate estimates are plotted in Figure 2, the experimental data and model fits are plotted in S2 Figure.
